# Supplementary material for: Sustained expression of microRNA-155 in hematopoietic stem cells causes a myeloproliferative disorder
Source: PubMed Central journal article supplement — J Exp Med. 2008 Mar 17;205(3):585–94. doi: 10.1084/jem.20072108 (PMC2275382; doi:10.1084/jem.20072108), 2008-03-17
Supplement: jexpmed_jem.20072108_6.pdf [file jexpmed_jem.20072108_6.pdf]

**Table S1.** Primer sequences used for cloning each respective 3'UTR into pmiReport

---

| Primer Name | Sequence                                   |
|-------------|--------------------------------------------|
| Bach1 F     | CCAGAGCTTAAATATAATTTGTAAAGC                |
| Bach1 R     | ACATTGAGAAGGCCAGTTCATAA                    |
| Sla F       | GTAAGTAGTTGACCTGGCTTGTACACACAC             |
| Sla R       | GTAAAGCTTTAAATACATGATTTGGCAAAGTGT<br>AA    |
| Cutl1 F     | TCAAGAGCTCGGCAAATCGCCATAGGC                |
| Cutl1 R     | AGCTACGCGTCCCTTCCTAACAATCAGATTAAT<br>AAAAT |
| Csf1r F     | GTAAGTAGTTCCTGCCGCTCTCTACGT                |
| Csf1r R     | GTTAGCTTCTGGCTGTGTTAATGCTGTTAGTT           |
| Jarid2 F    | GTAAGTAGTAGATGCCGAACCCATGGT                |
| Jarid2 R    | GTAAAGCTTATGAAGAGAAAAAATAGACAAGA<br>GGA    |
| Cebpb F     | GTAAGTAGTTGCAATCCGGATCAAACG                |
| Cebpb R     | GTAAAGCTTGGCTTTTAAACATTCTCCAAAAAA          |
| PU.1 F      | GTAAGTAGTCCGGCCATAGCATTAAAC                |
| PU.1 R      | GTAAAGCTTGGGAGAATAGCTGTCAATAATTTT<br>ACT   |
| Arntl F     | GTAAGTAGTACACTACATTTGCTTTGGCAAC            |
| Arntl R     | AGCTACGCGTAGAACAAGGGAAACATTTATTAA<br>AAAT  |
| Hif1a F     | TCAAGAGCTCCTGAGCGTTTCCTAATCTCATTC          |
| Hif1a R     | AGCTACGCGTCCCTGGTCCACAGAAGATGTTT           |
| Picalm F    | TCAAGAGCTCATGGAAGAGAATGGAATTACTCC<br>A     |
| Picalm R    | GTAAAGCTTTGTTTTGTGGAAGCTGCATT              |

**Table S2.** MiR155 seed sequences found in target gene 3' UTRs and subsequent mutations introduced to disrupt miR155-mediated repression

| miR155 seed | Wt               | Mutant |
|-------------|------------------|--------|
| Bach1 1     | AGCATTAAAGGTAAAA |        |
| Bach1 2     | AGCATTAAAGGTAAA  |        |
| PU.1        | AGCATTAAAGGTAAAA |        |
| Cutl1 1     | AGCATTAAAGGTAAAA |        |
| Cutl1 2     | GCATTAAAGGTAAA   |        |
| Picalm 1    | GCATTAAAGGTAAA   |        |
| Picalm 2    | AGCATTAAAGGTAAA  |        |
| Arntl 1     | GCATTAAAGGTAAA   |        |
| Arntl 2     | GCATTAAAGGTAAA   |        |
| Csf1r       | AGCATTAAAGCAAATA |        |
| Sla         | AGCATTAAAGCAAAT  |        |
| Arntl 1     | GCATTAAAGGTAAA   |        |
| Jarid2 1    | AGCATTAAAGCAAATA |        |
| Jarid2 2    | AGCATTAAAGCAAATA |        |
| Hif1a       | AGCATTAAAGCAAAT  |        |

Mutated nucleotides are in bold.

**Table S3.** Primer sequences used for quantitative PCR

| Primer Name | Sequence                |
|-------------|-------------------------|
| Bach1 F     | TGAGTGAGAGTGCGGTATTTGC  |
| Bach1 R     | GTCAGTCTGGCCTACGATTCT   |
| Sla F       | ATGGGGAATAGCATGAAATCCAC |
| Sla R       | GGAGATGGGTAGTCAGTCAGC   |
| Cutl1 F     | CGCAGAGAACTGTTTCATTGAGG |
| Cutl1 R     | GAGCTGAAGGTGAGTCGCT     |
| Csf1r F     | TGTCATCGAGCCTAGTGGC     |
| Csf1r R     | CGGGAGATTCAGGGTCCAAG    |
| Jarid2 F    | GAAGGCGGTAAATGGGCTTCT   |
| Jarid2 R    | TCGTTGCTAGTAGAGGACACTT  |
| Cebpb F     | GACAAGCACAGCGACGAGTA    |
| Cebpb R     | AGCTGCTCCACCTTCTTCTG    |
| PU.1 F      | ATGTTACAGGCGTGCAAAATGG  |
| PU.1 R      | TGATCGCTATGGCTTTCTCCA   |
| Arntl F     | ACCACAGGAACTTCTAGGTACAT |
| Arntl R     | GGACATTGGCTAAAACAACAGTG |
| Hif1a F     | ACCTTCATCGGAAACTCCAAAG  |
| Hif1a R     | ACTGTTAGGCTCAGGTGAACT   |
| Picalm F    | GTCTGTCCACGCCATGTCTG    |
| Picalm R    | TAGCAGAGAAAGGATCTCCCC   |
